# Supplementary material for: Evaluation of the Diagnostic Performance of Magnetic Resonance Spectroscopy in Brain Tumors: A Systematic Review and Meta-Analysis
Source: PubMed Central journal article supplement (PMC4231038; doi:10.1371/journal.pone.0112577), 2014-11-13
Supplement: pone.0112577.s001.pdf [file pone.0112577.s001.pdf]

|                | Random sequence generation (selection bias) | Allocation concealment (selection bias) | Blinding of participants and personnel (performance bias) | Blinding of outcome assessment (detection bias) | Incomplete outcome data (attrition bias) | Selective reporting (reporting bias) | Other bias |
|----------------|---------------------------------------------|-----------------------------------------|-----------------------------------------------------------|-------------------------------------------------|------------------------------------------|--------------------------------------|------------|
| Amin 2012      |                                             | +                                       | +                                                         | +                                               | +                                        | +                                    | +          |
| Crisi 2013     | -                                           | -                                       |                                                           | +                                               | +                                        |                                      |            |
| Davies 2008    | +                                           |                                         |                                                           |                                                 |                                          |                                      |            |
| Fayed 2006     |                                             |                                         | +                                                         | +                                               | +                                        |                                      |            |
| Floeth 2005    | +                                           | +                                       | +                                                         | +                                               | +                                        | +                                    |            |
| Guillevin 2011 | -                                           |                                         |                                                           | +                                               |                                          | +                                    |            |
| Hlaihel 2009   |                                             |                                         |                                                           | +                                               |                                          |                                      |            |
| Law 2003       | -                                           | +                                       | +                                                         | +                                               |                                          |                                      |            |
| Liu 2012       | +                                           |                                         | -                                                         | -                                               | +                                        | +                                    | +          |
| Palumbo 2006   |                                             |                                         | -                                                         | +                                               | -                                        | -                                    |            |
| Pamir 2013     |                                             |                                         |                                                           |                                                 | +                                        |                                      |            |
| Peng 2012      | +                                           | +                                       |                                                           |                                                 | +                                        | +                                    | +          |
| Prat 2010      |                                             |                                         |                                                           |                                                 | +                                        | +                                    |            |
| Reddy 2013     |                                             | +                                       | +                                                         | +                                               | -                                        | +                                    |            |
| Sahin 2013     |                                             | -                                       | -                                                         | +                                               | +                                        |                                      |            |
| Seeger 2013    | -                                           |                                         |                                                           |                                                 | +                                        | +                                    |            |
| Senft 2009     |                                             |                                         |                                                           |                                                 |                                          |                                      |            |
| Server 2011    |                                             |                                         | +                                                         | +                                               | +                                        | +                                    |            |
| Tate 2006      | +                                           | +                                       |                                                           | +                                               | +                                        | +                                    |            |
| Vellido 2012   | +                                           | +                                       |                                                           |                                                 | +                                        | +                                    |            |
| Wang 1995      | -                                           | -                                       | +                                                         | +                                               | +                                        | +                                    |            |
| Zeng 2007      | -                                           |                                         | +                                                         | +                                               | -                                        | -                                    |            |
| Zeng 2011      |                                             |                                         | +                                                         | +                                               | -                                        |                                      |            |
| Zou 2011       | -                                           | -                                       | +                                                         | +                                               | -                                        |                                      |            |
